# Supplementary material for: Matrix removal before inductively coupled plasma spectrometric detection: another capability of flow field-flow fractionation
Source: Royal Society of Chemistry journal article supplement (doi:10.1039/b607204f), 2006-01-01
Supplement: b607204f_esi.doc [file b607204f_esi.doc]

**This journal © The Royal Society of Chemistry 2006**

**Parameters affecting complex formation**

To study effect of pH on complex formation, test solutions were prepared to contain 1 mg l-1 of multi-elements and 500 mg l-1 of PEI by varying pH from 3.0 to 10.5. The pH was adjusted by adding appropriate amounts of either HNO3 or NaOH. To study effect of PEI concentration on complex formation, test solutions were adjusted to pH 9 using borate buffer and prepared to contain 1 mg l-1 of multi-elements with varying concentrations of PEI as 250, 500, 1,000, 1,500, and 2,000 mg l-1.

Matrix removal with simultaneous analyte preconcentration was performed exploiting the combined concept of complexation and filtration. A high molecular weight complexing agent, i.e., poly(ethylene imine) or PEI, was used to form relatively strong complexes with analyte elements, whereas it should not or only weakly form complex with the matrix elements [24]. The sample-complexing agent mixture was introduced into the FlFFF channel. Owing to their high molecular weight, the analyte-PEI complexes remained in the FlFFF channel. The uncomplexed matrix elements, however, permeated through the membrane. This concept was proposed earlier by Al-Ammar et al. [24]. In their report, however, details of parameters affecting complex formation were not fully described, and therefore were considered in this study. The ability of the molecules to form complexes with metal ions depends on several parameters, such as pH and PEI concentration. Effect of pH on the complex formation between PEI and analyte elements was investigated for the pH range of 3.0-10.5. For all analyte elements studied, the intensities increased with increasing pH values from 3.0-8.0, owing to the increase in favorable binding to metal ions at high pH. At pH 8.0-10.5, however, the signal intensities were quite constant. Naturally, the amine groups are deprotonated at high pH values and therefore the metal coordination sites increase [a]. At low pH values, electron donating amine groups are protonated and become positively charged and thus are unable to form complex with metal ions [a]. As the analyte elements were effectively chelated by PEI at pH  8, the pH at 9 was therefore selected as an optimum condition. The pH values higher than 9 were not used because the presence of high hydroxyl anion concentrations might compete with PEI to bind with analyte ions.

Considering the effect of PEI concentration on complex formation, it is important that the concentration of PEI must be in excess for quantitative complexation with analyte ions. However, when the PEI concentration was too high, the solution became viscous affecting the nebulization transport efficiency [b,c]. In addition, high concentration of PEI leads to high concentration of carbon and can result in non-spectral matrix enhancement through charge transfer process [d]. Therefore, the optimum PEI concentration should be carefully chosen. The intensities increased with increasing PEI concentration from 250-1,000 mg l-1, and only slightly increased from 1,000-2,000 mg l-1, implying that the PEI concentrations lower than 1,000 mg l-1 were not adequate for complete complex formation with analyte ions. Therefore, PEI of 1,500 mg l-1 was chosen to ensure maximum complex formation with minimal negative effect on nebulization efficiency.

**Fig. S1 (**a) Effect of pH and b) PEI concentration on the complex formation of analyte elements with PEI as observed from signal intensities of various analyte elements, i.e., 63Cu (); 66Zn (); 111Cd (); 202Hg ();and 208Pb ()

**Fig. S2** Relationship between % recovery of Cu and focusing times at various focusing flow rates: 1.0:1.0 (); 1.5:1.5 (); and 2.0:2.0 () ml min-1

References

a) K. E. Geckeler and K. Volchek, *Environ. Sci. Tech.*, 1996, **30**, 725.

b) S. Greenfield, H. M. McGeachin and P. B. Smith, *Anal. Chim. Acta,* 1976, **84**, 67.

c) J. W. Olesik and L. C. Bates, *Spectrochim. Acta,Part B,* 1995, **50B**, 285.

d) A. S. Al-Ammar, E. Reitznerová and R. M. Barnes, *Spectrochim. Acta, Part B*, 1999, **54**, 1813.
